# Supplementary material for: Kisspeptin receptor agonist has therapeutic potential for female reproductive disorders
Source: JCI journal article supplement (doi:10.1172/jci139681), 2020-11-15
Supplement: sd3 [file 3]

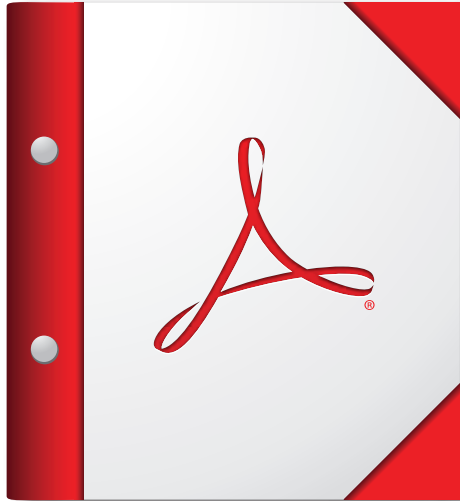

**For the best experience, open this PDF portfolio in  
Acrobat X or Adobe Reader X, or later.**

[Get Adobe Reader Now!](#)
